# Supplementary material for: Therapeutic Potential of a Novel αvβ3 Antagonist to Hamper the Aggressiveness of Mesenchymal Triple Negative Breast Cancer Sub-Type
Source: MDPI journal article supplement (doi:10.3390/cancers11020139), 2019-01-24
Supplement: s1 [file s1]

## Supplementary Materials: Therapeutic potential of a novel $\alpha_v\beta_3$ antagonist to hamper the aggressiveness of mesenchymal triple negative breast cancer subtype

Billy Samuel Hill, Annachiara Sarnella, Domenica Capasso, Daniela Comegna, Annarita Del Gatto, Matteo Gramanzini, Sandra Albanese, Michele Saviano, Laura Zaccaro and Antonella Zannetti

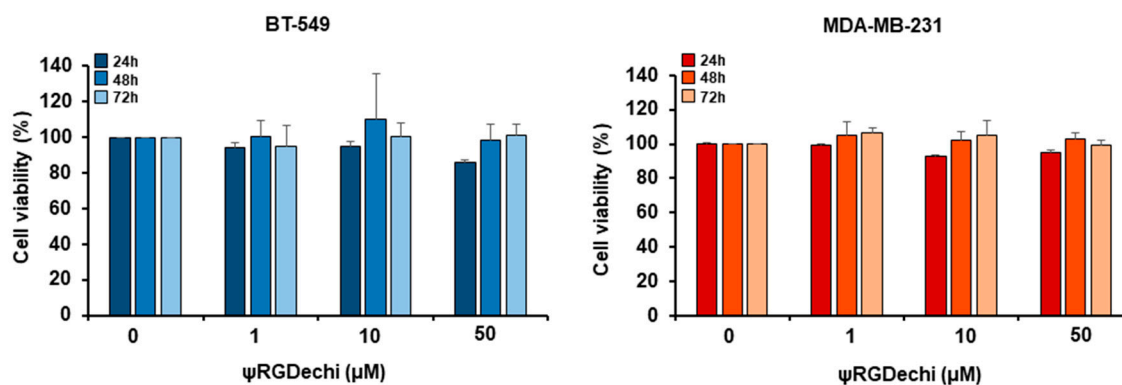

**Figure S1.** Effect of  $\psi$ RGDechi on MES-TNBC cell proliferation. Viability of MDA-MB-231 and BT-549 cells ( $5.0 \times 10^3$  cells/well) untreated and treated with  $\psi$ RGDechi (1 to 50  $\mu$ M) at times 24, 48 and 72 hours by MTS Assay. Absorbance was read in a plate reader at a wavelength of 490 nm. The data are expressed as percentage of viable cells, considering the untreated control cells as 100%. Bars depict mean  $\pm$  SD of three independent experiments.
